# Integrin $\alpha 8 \beta 1$ mediates adhesion to LAP-TGF $\beta 1$

Min Lu<sup>1</sup>, John S. Munger<sup>2</sup>, Melissa Steadale<sup>3</sup>, Christina Busald<sup>3</sup>, Marinka Tellier<sup>1</sup> and Lynn M. Schnapp<sup>1,3,\*</sup>

<sup>1</sup>Pulmonary and Critical Care Medicine, Department of Medicine, Mount Sinai School of Medicine, New York, NY 10029, USA

<sup>2</sup>Departments of Medicine and Cell Biology, NYU School of Medicine, New York, NY 10016, USA

<sup>3</sup>Pulmonary and Critical Care Medicine, Harborview Medical Center, University of Washington, Seattle, WA 98104, USA

\*Author for correspondence (e-mail: lschnapp@u.washington.edu)

Accepted 3 September 2002

Journal of Cell Science 115, 4641-4648 © 2002 The Company of Biologists Ltd

doi:10.1242/jcs.00145

## Summary

The development of fibrosis is a common response to a variety of injuries and results in the net accumulation of matrix proteins and impairment of normal organ function. We previously reported that the integrin  $\alpha 8 \beta 1$  is expressed by alveolar interstitial cells in normal lung and is upregulated during the development of fibrosis. TGF $\beta 1$  is an important mediator of the inflammatory response in pulmonary fibrosis. TGF $\beta 1$  is secreted as a latent protein that is non-covalently associated with latency-associated peptide (LAP) and requires activation to exert its effects. LAP-TGF $\beta 1$  and LAP-TGF $\beta 3$  contain the tripeptide sequence, arginine-glycine-aspartic acid (RGD), a known integrin recognition motif. The integrin  $\alpha 8 \beta 1$  binds to several ligands such as fibronectin and vitronectin through the RGD sequence. Recent reports demonstrate that the integrins  $\alpha v \beta 1$ ,  $\alpha v \beta 6$  and  $\alpha v \beta 8$  adhere to LAP-TGF $\beta 1$  through the RGD site. Therefore, we asked whether LAP-TGF $\beta 1$  might be a ligand for  $\alpha 8 \beta 1$  and whether this may

be important in the development of fibrosis. We found that cell lines transfected with  $\alpha 8$  subunit were able to spread on and adhere to recombinant LAP-TGF $\beta 1$  significantly better than mock transfected cell lines.  $\alpha 8$ -transfected cells were also able to adhere to LAP-TGF $\beta 3$  significantly better than mock transfected cells. Adhesion to LAP-TGF $\beta 1$  was enhanced by activation of  $\alpha 8 \beta 1$  by Mn<sup>2+</sup>, or 8A2, an integrin  $\beta 1$  activating antibody. Furthermore, cell adhesion was abolished when we used a recombinant LAP-TGF $\beta 1$  protein in which the RGD site was mutated to RGE.  $\alpha 8 \beta 1$  binding to LAP-TGF $\beta 1$  increased cell proliferation and phosphorylation of FAK and ERK, but did not activate of TGF $\beta 1$ . These data strongly suggest that LAP-TGF $\beta 1$  is a ligand of  $\alpha 8 \beta 1$  and interaction of  $\alpha 8 \beta 1$  with LAP-TGF $\beta 1$  may influence cell behavior.

Key words: Integrin, LAP-TGF- $\beta$ ,  $\alpha 8 \beta 1$ , Cell signaling

## Introduction

TGF- $\beta$  is a growth factor that was originally described by its ability to induce anchorage independent growth in fibroblasts. Three closely related isoforms exist (TGF $\beta 1$ ,  $\beta 2$  and  $\beta 3$ ) which have a similar range of effects. Many of its effects are profibrotic: increased extracellular matrix synthesis, increased TIMP synthesis and decreased protease synthesis (Taipale et al., 1998). TGF- $\beta$  requires activation before it binds to its cognate receptors and exerts its effects. TGF- $\beta$  is synthesized as a proprotein. Proteolytic processing separates the N-terminal propeptide from TGF $\beta$ . After processing, TGF $\beta$  noncovalently associates with its propeptide. Because this interaction prevents TGF $\beta$  from binding its receptors, the propeptide is termed latency-associated peptide (LAP). Within the secretory pathway, the complex of TGF $\beta$  and LAP, referred to as the small latent complex, usually associates with another family of proteins, the latent TGF- $\beta$ -binding proteins (LTBP), to form large latent complex (LLC). LLC can become incorporated into the extracellular matrix. LAP-TGF $\beta 1$  and LAP-TGF $\beta 3$  contain a conserved tripeptide sequence, arginine-glycine-aspartic acid (RGD) that is found in many extracellular matrix proteins and is a known recognition sequence for integrins. Integrins are glycoproteins that consist of two non-covalently associated subunits,  $\alpha$  and

$\beta$ . Each integrin subunit has a unique cytoplasmic domain that elicits cellular responses by interacting with distinct signaling pathways. Interactions of integrins with their ligands result in alterations in many cellular activities such as migration, proliferation, apoptosis and matrix remodeling.

Recent work showed that LAP-TGF $\beta 1$  binds to the integrins  $\alpha v \beta 1$  (Munger et al., 1998) and  $\alpha v \beta 6$  (Munger et al., 1999). Binding of  $\alpha v \beta 6$  to LAP-TGF $\beta 1$  activates TGF $\beta 1$ , independent of protease activity. Mice lacking the  $\beta 6$  integrin subunit are protected from the development of pulmonary fibrosis due to the inability to activate TGF $\beta 1$  (Munger et al., 1999).

We previously characterized the human integrin subunit,  $\alpha 8$ , which pairs exclusively with  $\beta 1$  to form the heterodimer  $\alpha 8 \beta 1$  (Schnapp et al., 1995a). The integrin  $\alpha 8 \beta 1$  interacts with the RGD sequences in several matrix proteins including fibronectin, vitronectin, tenascin, osteopontin (Denda et al., 1998; Muller et al., 1995; Schnapp et al., 1995b) and nephronectin (Brandenberger et al., 2001).  $\alpha 8 \beta 1$  is expressed in alveolar interstitial cells and is upregulated during pulmonary and hepatic fibrosis (Levine et al., 2000). We now report that LAP-TGF $\beta 1$  is a ligand for  $\alpha 8 \beta 1$  and that binding of LAP-TGF $\beta 1$  to  $\alpha 8 \beta 1$  increases spreading and proliferation of cells and increases phosphorylation of the proteins FAK and ERK.

## Materials and Methods

### Cells and reagents

Human embryonic kidney 293 and human colon carcinoma SW480 cell lines and CHO cells were obtained from American Type Culture Collection and grown in Dulbecco's modified Eagle's medium (DMEM) supplemented with 10% fetal calf serum (FCS) and penicillin/streptomycin. AtT20 cells were a gift from Jean Schwarzbauer (Princeton University, NJ) and maintained in DMEM/Ham's F12, 10% FCS, 10% Nu-serum (Sigma), 200  $\mu$ m HEPES, penicillin/streptomycin.  $\beta$ 6-transfected SW480 cells were a gift from Dean Sheppard (UCSF, CA). Cells were transfected with pCDNAIneo $\alpha$ 8 ( $\alpha$ 8-transfected cells) or pCDNAIneo alone (mock-transfected cells) using the Lipofectin reagent (Gibco-BRL) according to the manufacturer's instructions. Stably transfected cell lines were selected in medium containing the neomycin analog G418 (0.4 mg/ml). Surface expression of  $\alpha$ 8 $\beta$ 1 was confirmed by immunoprecipitation of surface biotinylated proteins.

Mink lung epithelial cells (Mv1Lu) stably transfected with a portion of the plasminogen activator inhibitor 1 (PAI-1) promoter upstream of a luciferase reporter gene were used as previously described (Abe et al., 1994). Recombinant LAP-TGF $\beta$ 1 and RGE-LAP-TGF $\beta$ 1 were produced in a baculovirus system as described (Munger et al., 1998). Production of TGF $\beta$ 3 cDNA expression construct was previously reported (Annes et al., 2002). TGF $\beta$ 3 was cloned into pCDNA-Fc vector and used for protein purification as previously described (Annes et al., 2002).

Fibronectin (FN) was purchased from Boehringer Mannheim and poly-L-lysine was purchased from Sigma. Rabbit polyclonal antibody to FAK and HRP-conjugated anti-phosphotyrosine antibody (clone 4G10) were obtained from Upstate Biotechnology. Antibody to phosphorylated ERK was obtained from Santa Cruz. Polyclonal antibody to recombinant human LAP-TGF $\beta$ 1 (AF-246-NA) was obtained from R&D Systems. The integrin-activating antibody 8A2 and the  $\beta$ 1 integrin blocking antibody 5D1 were a generous gift from John Harlan, University of Washington (Seattle, WA). The  $\alpha$ v integrin blocking antibody L230 was prepared from hybridoma cells obtained from American Type Culture Collection (ATCC). Working dilutions for antibodies were determined for each application to optimize the results.

### Adhesion assays

The assays were performed as previously described (Schnapp et al., 1995b). Briefly, untreated polystyrene 96-well flat bottom microtiter plates (Evergreen) were coated with increasing concentrations (0.3, 1, 3, 10, 20  $\mu$ g/ml) of protein (LAP-TGF $\beta$ 1, LAP-TGF $\beta$ 3, FN) or 0.01% poly-L-lysine. As a negative control, wells were coated with 1% BSA. Wells coated at 37°C for 1 hour were washed with phosphate buffered saline (PBS: 137 mM NaCl, 2.7 mM KCl and 10 mM Na<sub>2</sub>HPO<sub>4</sub>, pH 7.4) and non-specific protein binding sites were saturated with 1% BSA for 30 minutes at 37°C. Cells were detached with 2 mM EDTA, washed with PBS and resuspended in serum-free DMEM (pH 7.4) with or without 5 mM Mn<sup>2+</sup>. In some experiments, cells were preincubated with integrin blocking antibodies L230 or 5D1, or integrin-activating antibody 8A2 for 15 minutes on ice, prior to addition to wells. 50,000 cells were added to each well, centrifuged at 10 g for 3 minutes to ensure uniform settling of cells and incubated for 1 hour at 37°C. Non-adherent cells were then removed by centrifugation (top-side down) at 10 g for 5 minutes. The attached cells were fixed and stained with 1% formaldehyde/0.5% crystal violet/20% methanol for 30 minutes at RT. After washing with PBS, adherence was determined by absorption at 595 nm in a Microplate Reader (Bio-Rad, Richmond, CA). The data were reported as the mean absorbance of triplicate wells  $\pm$  s.e., minus the mean absorbance of BSA-coated wells.

### LAP TGF $\beta$ 1 ELISA

Lungs were extracted from C57BL/6 mice ( $n=3$ ) after perfusion with PBS/heparin through the RV outflow tract until the lungs blanched, to remove blood. Lungs were weighed, placed in 2 ml PBS and homogenized 30 seconds with tissue homogenizer. Samples were filtered through a 0.45 micron filter to remove debris. Ninety-six well plates (Nunc-immunoplate, maxisorp surface) were coated overnight at 4°C with serial dilutions of lung homogenate in duplicate. Wells were coated with BSA alone as negative controls. To generate a standard curve, wells were coated with serial dilutions of recombinant LAP-TGF $\beta$ 1 protein. Non-specific binding sites were then saturated with 3% BSA/PBS for 1 hour at 37°C. Wells were washed with PBS-0.05% Tween and then incubated with 50  $\mu$ l of anti-LAP-TGF $\beta$ 1 IgG antibody (0.5  $\mu$ g/ml) (R&D Systems) at RT for 2 hours. Unbound protein was removed by washing with PBS/0.05% Tween. Biotinylated rabbit anti-goat IgG (0.15  $\mu$ g/ml) was added to wells for 1 hour at RT, followed by addition of streptavidin AH-Biotin complex solution (Zymed SABC kit). Color development was performed using TMB Microwell Peroxidase Substrate system (KPL) and read at 450 nm after addition of stop solution (1 M phosphoric acid). The detection limit was approximately 60 pg/well. The concentration of LAP-TGF $\beta$ 1 in the samples was determined by interpolation from the standard curve.

### TGF $\beta$ bioassays

TGF- $\beta$ 1 bioassay was performed as previously described (Munger et al., 1999). Briefly, 100  $\mu$ l of Mv1Lu reporter cells were plated at a density of 10<sup>5</sup> cells/ml and allowed to adhere for 1 hour at 37°C in DMEM containing 10% FCS. Equal number of test cells were added to wells and cultured for 16 hours. In some experiments, test cells were incubated with the  $\beta$ 1 integrin-activating antibody 8A2 for 15 minutes prior to addition to Mv1Lu reporter cells. Lysates were assayed for luciferase activity using Luciferase Assay System (Promega). As a positive control, Mv1Lu reporter cells were cultured with recombinant TGF $\beta$ 1 (gift of Dan Rifkin). To determine whether  $\alpha$ 8 $\beta$ 1 expression affected the activation of TGF $\beta$ 1 by  $\alpha$ v $\beta$ 6, we incubated Mv1Lu reporter cells with  $\beta$ 6-transfected SW480 (0.5 $\times$ 10<sup>5</sup> cells) and either  $\alpha$ 8-transfected SW480 or mock-transfected SW480 cells, and assayed for luciferase activity as described above.

To measure TGF- $\beta$ 3 activation, we transfected mock or  $\alpha$ 8 transfectants with TGF $\beta$ 3 cDNA expression vector or control vector using Lipofectamine Plus (Life Technology) (Annes et al., 2002). After 16 hours, cells were added to reporter cells for 24 hours and luciferase activity was measured as above. When high amounts of TGF $\beta$ 3 cDNA were used for transfection, autoactivation of TGF- $\beta$ 3 occurred. Therefore, we titered the amount of cDNA and found that transfection with 100 ng of TGF $\beta$ 3 cDNA eliminated autoactivation and resulted in detectable amounts of TGF $\beta$ 3 in supernatants.

### Immunoprecipitation and western blot analysis

For FAK and ERK phosphorylation, cells were plated on ligands for 30 minutes, and then lysed in buffer containing 50 mM Tri-HCl (pH 7.4), 150 mM NaCl, 0.25% sodium deoxycholate, 1% IGEPAL CA-630 (non-ionic, non-denaturing detergent, Sigma), 1 mM EGTA, 1 mM PMSE, 1 mM NaVO<sub>3</sub>, 1 mM NaF, 1 mg/ml each of aprotinin, leupeptin, pepstatin. Samples were incubated with antibodies for 1-2 hours at 4°C. Immune complexes were captured with Protein A sepharose (Pharmacia). Beads were washed 5 times, boiled for 5 minutes in Laemli sample buffer and then proteins were separated by SDS-PAGE. Gels were transferred to Immobilon and non-specific binding sites were saturated with 3% BSA for 1 hour. Blots were incubated with primary antibody for 1 hour, followed by peroxidase conjugated secondary antibody for 1 hour and then developed with ECL (Amersham).

### Proliferation assays

$5 \times 10^3$  AtT20 or AtT20  $\alpha 8$ -transfected cells were plated in serum-free media in 96 well plates coated with 5  $\mu\text{g/ml}$  LAP-TGF $\beta 1$ , FN, or 0.01% poly-L-lysine. Proliferation was assayed at indicated times using the Roche Cell Proliferation Kit (MTT) per manufacturer's instructions. Four independent clones of AtT20 $\alpha 8$  were tested. All experiments were performed in triplicate and presented as the mean  $\pm$  s.e.

### Immunohistochemistry

Lungs were obtained from 8-week-old C57BL/6 mice as previously described (Madtes et al., 2001). Briefly, the lungs was inflated with 4% neutral buffered paraformaldehyde instilled at 30 cm H<sub>2</sub>O pressure through the trachea for 120 minutes. The trachea was then tied and the lung immersed in the RNase-free, 4% buffered paraformaldehyde for 24 hours before embedding in paraffin. 5- $\mu\text{m}$  sections of lung fixed with 4% (wt/vol) paraformaldehyde were deparaffinized and rehydrated. Endogenous peroxidase and biotin activity was saturated by incubation of the sections in Peroxoblock (Zymed), followed by Avidin-Biotin Blocking Reagent (Zymed). The sections were incubated overnight at 4°C with affinity purified goat anti-human LAP-TGF $\beta 1$  IgG antibody (2.5  $\mu\text{g/ml}$ ) (R&D Systems). Primary antibody was detected with biotinylated rabbit anti-goat IgG antibody (Zymed Laboratories) (0.15  $\mu\text{g/ml}$ ). Bound antibody was visualized with ABC peroxidase (Vector Laboratories). The sections were counterstained with hematoxylin. As a negative control, adjacent serial sections were stained in the absence of primary antibody.

## Results

### $\alpha 8 \beta 1$ mediates adhesion to LAP-TGF $\beta 1$

To determine whether  $\alpha 8 \beta 1$  binds to LAP-TGF $\beta 1$ , we examined the adhesion of  $\alpha 8$ -transfected cells to recombinant LAP-TGF $\beta 1$  in 4 different cell lines. We found that  $\alpha 8$ -transfected cells adhered to 5  $\mu\text{g/ml}$  LAP-TGF $\beta 1$  significantly better than mock transfected in all cell lines tested (Fig. 1A). Adhesion of 293 cells to LAP-TGF $\beta 1$  was inhibited with an anti- $\alpha v$  antibody, consistent with previous reports showing 293 cells adhere to LAP-TGF $\beta 1$  through the integrin  $\alpha v \beta 1$  (Munger et al., 1998). Adhesion of 293 $\alpha 8$  and SW480 $\alpha 8$  cells to LAP-TGF $\beta 1$  was inhibited by an anti- $\beta 1$  integrin blocking antibody, 5D1. When adhesion to increasing concentrations of LAP-TGF $\beta 1$  was tested, there was a significant difference in the adhesion of SW480 $\alpha 8$  cells and SW480 $\beta 6$  cells (Fig. 1B). SW480 $\alpha 8$  cells adhered to LAP-TGF $\beta 1$  only at concentrations of 5  $\mu\text{g/ml}$  or higher, whereas SW480 $\beta 6$  cells adhered to LAP-TGF $\beta 1$  at much lower concentrations (0.3  $\mu\text{g/ml}$ ) consistent with previous reports (Munger et al., 1999). When  $\alpha 8 \beta 1$  was activated with either an integrin  $\beta 1$  activating antibody, 8A2, or 1 mM Mn<sup>2+</sup>, we observed enhanced adhesion of SW480 $\alpha 8$  to LAP-TGF $\beta 1$ , at levels equivalent to or greater than  $\beta 6$ -mediated adhesion (Fig. 1B and data not shown).

In contrast to LAP-TGF $\beta 1$ , fibronectin (a known RGD-containing ligand for  $\alpha v \beta 6$  and  $\alpha 8 \beta 1$ ) supported adhesion of unactivated SW480 $\beta 6$  and SW480 $\alpha 8$  cells equally well (Fig. 1C). Cell surface expression of  $\alpha 8$  and  $\beta 6$  was similar in SW480 cells (data not shown). To confirm that the RGD site in LAP-TGF $\beta 1$  was involved in binding to  $\alpha 8 \beta 1$ , we examined adhesion of  $\alpha 8$ -transfected cells to a recombinant LAP-TGF $\beta 1$  in which the RGD site was mutated to RGE. Mutation of RGD to RGE eliminated  $\alpha 8 \beta 1$ -mediated adhesion to LAP-TGF $\beta 1$  in all cell lines tested (Fig. 1D).

### LAP-TGF $\beta 1$ and LAP-TGF $\beta 3$ support $\alpha 8 \beta 1$ adhesion with similar efficacy

Because LAP-TGF $\beta 3$  contains an RGD sequence in a similar location as LAP-TGF $\beta 1$ , we asked whether LAP-TGF $\beta 3$  was also a ligand for  $\alpha 8 \beta 1$ . We examined the adhesion of AtT20 $\alpha 8$  cells and AtT20 mock cells to recombinant LAP-TGF $\beta 3$ . We found that AtT20 $\alpha 8$  cells adhered to LAP-TGF $\beta 3$  significantly better than mock transfected cells (Fig. 1E). The adhesion of  $\alpha 8$ -transfected cells to LAP-TGF $\beta 3$  was similar to adhesion to LAP-TGF $\beta 1$  (Fig. 1E).

### Adhesion to LAP-TGF $\beta 1$ results in cell signaling

Integrin mediated signaling results in alterations in the cytoskeleton, leading to cell shape changes. When AtT20 cells were plated on LAP-TGF $\beta 1$ , cells became flat and spread on the substrate, and developed long extensions (Fig. 2i). Focal adhesion kinase (FAK) is present at focal contacts and becomes phosphorylated after integrin-mediated cell adhesion and plays a role as an adapter protein for integrin-mediated cell signaling. We hypothesized that if LAP-TGF $\beta 1$  is a ligand for  $\alpha 8 \beta 1$ , adhesion of  $\alpha 8 \beta 1$ -expressing cells to LAP-TGF $\beta 1$  would lead to FAK phosphorylation. We plated mock-transfected or  $\alpha 8$ -transfected AtT20 cells on plates coated with poly-L-lysine (which allows non-integrin mediated adhesion), fibronectin (a known ligand for  $\alpha 8 \beta 1$ ) and LAP-TGF $\beta 1$  and RGE-LAP-TGF $\beta 1$  for 30 minutes in serum-free media. Cells were lysed in the presence of phosphatase and protease inhibitors, and immunoprecipitated with anti-FAK antibody, followed by blotting with anti-phosphotyrosine antibody or FAK antibody. We found that interaction of LAP-TGF $\beta 1$  with  $\alpha 8 \beta 1$  leads to tyrosine phosphorylation of FAK comparable to phosphorylation seen after fibronectin adhesion (Fig. 2ii). Furthermore, mutation of the LAP-TGF $\beta 1$  RGD site to RGE eliminated FAK phosphorylation. Mock transfected cells did not show FAK phosphorylation when grown on LAP-TGF $\beta 1$  or fibronectin.

### LAP-TGF $\beta 1$ - $\alpha 8 \beta 1$ mediates cell proliferation

We then asked whether cell behaviors such as proliferation were affected by adhesion to LAP-TGF $\beta 1$ . We found that  $\alpha 8$ -transfected cells proliferated significantly better when grown on LAP-TGF $\beta 1$  compared to mock transfected cells grown on LAP-TGF $\beta 1$  in serum-free media (Fig. 3A). The degree of proliferation was similar to that of cells grown on fibronectin. To insure that the enhanced proliferation was not due to clonal variation, we tested four independent clones of AtT20 $\alpha 8$  transfectants. All showed a significant increase in proliferation compared to mock transfected or wild type cells (Fig. 3A and data not shown) The average fold increase in proliferation was 1.9 compared to mock transfected cells. We examined whether ERK was phosphorylated in response to  $\alpha 8 \beta 1$ -LAP-TGF $\beta 1$  binding. We found an increase in phospho-ERK levels in  $\alpha 8$ -transfected cells adherent to LAP-TGF $\beta 1$ , compared to  $\alpha 8$ -transfected cells adherent to poly-L-lysine, or mock-transfected cells (Fig. 3B).

### $\alpha 8 \beta 1$ binding to LAP-TGF $\beta 1$ does not affect activation of TGF $\beta 1$

We asked whether binding of  $\alpha 8 \beta 1$  to LAP-TGF $\beta 1$  activated

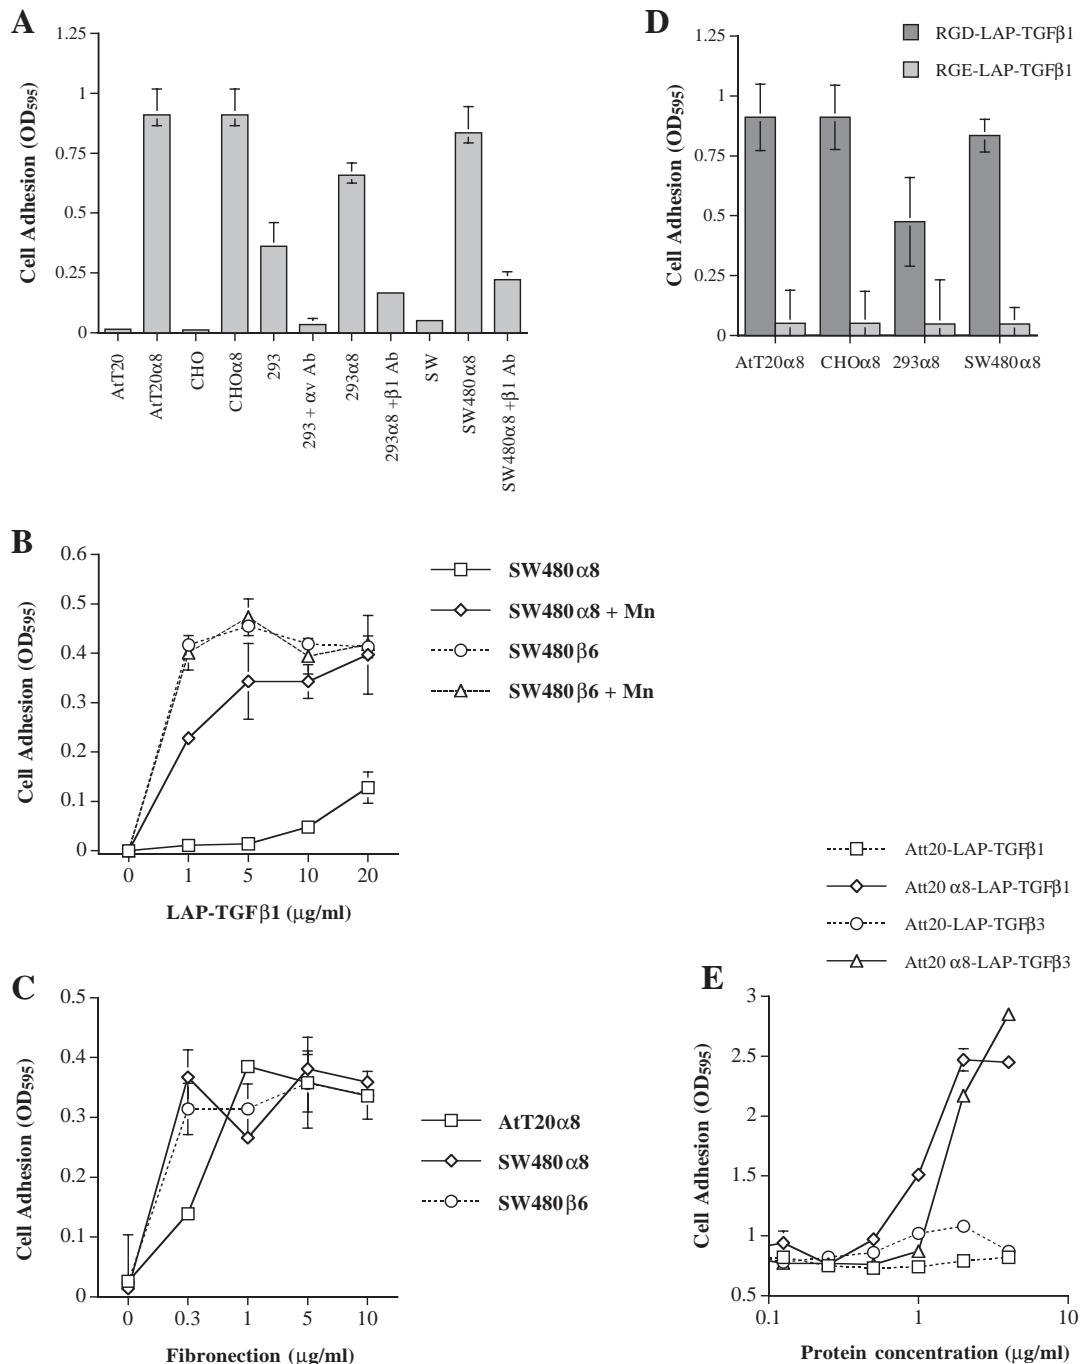

TGFβ1, as described for αvβ6 (Munger et al., 1999). As an indicator of TGFβ1 activation, we used Mv1Lu reporter cells transfected with a portion of the plasminogen activator inhibitor-1 (PAI-1) promoter upstream of a luciferase reporter gene. The PAI-1 promoter contains a well-characterized TGFβ-responsive element. Therefore, if active TGFβ1 is present, an increase in luciferase activity will be detected. Mv1Lu reporter cells were co-cultured with mock-transfected SW480 cells or α8-transfected SW480 cells. As a positive control, Mv1Lu reporter cells were cultured with TGFβ1, or with SW480β6 cells. Luciferase activity did not increase when α8-transfected cells were cultured with MLEC, suggesting that

adhesion of LAP-TGFβ1 to α8β1 was not sufficient to activate TGFβ1 (Fig. 4A). Addition of 8A2 or Mn<sup>2+</sup>, which enhanced adhesion of α8 cells to LAP-TGFβ1, did not affect TGFβ activation (Fig. 4A, data not shown).

We then asked whether adhesion of α8β1 to LAP-TGFβ1 affected the activation of TGFβ1 mediated by αvβ6, by competing for LAP-TGFβ1. We set up a triple co-culture system using Mv1Lu reporter cells cultured with SW480β6 and either α8-transfected SW480 cells or mock-transfected SW480 cells. No difference in αvβ6-mediated activation of TGFβ1 was found between α8-transfected SW480 cells and mock-transfected SW480 cells (Fig. 4B). Since we found

**Fig. 1.** (A)  $\alpha 8\beta 1$  adhesion to LAP-TGF $\beta 1$ . Mock transfected or  $\alpha 8$ -transfected cells (50,000/well) were allowed to attach to wells pre-coated with 5  $\mu\text{g/ml}$  of recombinant LAP-TGF $\beta 1$ . In some cases, cells were incubated with  $\alpha \nu$  integrin antibody (L230) or  $\beta 1$  integrin antibody (5D1) prior to adhesion assay. After 1 hour, non-adherent cells were removed by brief centrifugation and adherent cells were fixed and stained with formaldehyde/crystal violet. Adherent cells were quantitated by measuring absorbance of wells at OD<sub>595</sub>. Data are reported as the average of triplicate wells  $\pm$  s.e., minus the mean absorbance of the BSA-coated well. (B) Adhesion of SW480 $\alpha 8$  or SW480 $\beta 6$ -transfected cells to increasing concentrations of LAP-TGF $\beta 1$  with or without 1mM Mn<sup>2+</sup>. After 1 hour, non-adherent cells were removed by brief centrifugation and adherent cells were fixed and stained with formaldehyde/crystal violet. Adherent cells were quantitated by measuring absorbance of wells at OD<sub>595</sub>. Data are reported as the average of triplicate wells  $\pm$  s.e., minus the mean absorbance of the BSA-coated well. (C) Adhesion of  $\alpha 8$  or  $\beta 6$ -transfected cells to fibronectin. AtT20 $\alpha 8$ , SW480 $\alpha 8$  or SW480 $\beta 6$  cells were allowed to attach to wells precoated with the indicated concentration of fibronectin. After 1 hour, non-adherent cells were removed by brief centrifugation and adherent cells were fixed and stained with formaldehyde/crystal violet. Adherent cells were quantitated by measuring absorbance of wells at OD<sub>595</sub>. Data are reported as the average of triplicate wells  $\pm$  s.e., minus the mean absorbance of the BSA-coated well. (D) Mutation of RGD site in LAP TGF $\beta 1$  eliminates  $\alpha 8\beta 1$  adhesion.  $\alpha 8$ -transfected cells were allowed to attach to wells coated with 5  $\mu\text{g/ml}$  of authentic recombinant LAP-TGF $\beta 1$  (RGD-LAP-TGF $\beta 1$ ) or recombinant LAP-TGF $\beta 1$  containing a single glutamic acid for aspartic acid substitution mutation in the RGD site (RGE-LAP-TGF $\beta 1$ ) for 1 hour; adhesion was then assessed by absorbance. Data are reported as the average of triplicate wells  $\pm$  s.e., minus the mean absorbance of BSA-coated well. (E) Adhesion of AtT20 $\alpha 8$  cells to LAP-TGF $\beta 3$  is similar to adhesion to LAP-TGF $\beta 1$ . AtT20 or AtT20 $\alpha 8$  cells were allowed to adhere to increasing concentrations of recombinant LAP-TGF $\beta 1$  or LAP-TGF $\beta 3$  for 1 hour; adhesion was then assessed by absorbance. Data are reported as the average of triplicate wells  $\pm$  s.e., minus the mean absorbance of the BSA-coated well.

adhesion of  $\alpha 8$ -transfected cells to LAP-TGF $\beta 3$ , we asked whether that interaction led to activation of LAP-TGF $\beta 3$ . Recent reports showed that  $\alpha \nu \beta 6$ , which activated TGF $\beta 1$ , also binds and activates TGF $\beta 3$  (Annes et al., 2002). However, we found no difference in activation of LAP-TGF $\beta 3$  when we compared CHO and CHO- $\alpha 8$  cells transfected with LAP-TGF $\beta 3$  (Fig. 4C). Similar negative results were observed with 293 and 293 $\alpha 8$  cells (data not shown). These results suggest that  $\alpha 8\beta 1$  does not activate LAP-TGF $\beta 3$ .

#### Immunolocalization and concentration of LAP-TGF $\beta 1$ in lung

We previously showed that  $\alpha 8$  is localized to lung interstitial cells and is upregulated during pulmonary fibrosis. Using an antibody specific for LAP-TGF $\beta 1$ , we examined the immunolocalization of LAP-TGF $\beta 1$  in normal lung tissue (Fig. 5). Immunoreactivity for LAP was detected along the interstitial cells, in a patchy pattern similar to alpha 8 immunolocalization, as well as in macrophages. To estimate the relative concentration of LAP-TGF $\beta 1$  in mouse lung, we developed an ELISA for LAP-TGF $\beta 1$  for use on whole mouse lung homogenates. The measurements ranged from 0.5 to 8  $\mu\text{g/mg}$  lung tissue with an average of 3.38  $\mu\text{g}$  of LAP-TGF $\beta 1$  per mg lung tissue.

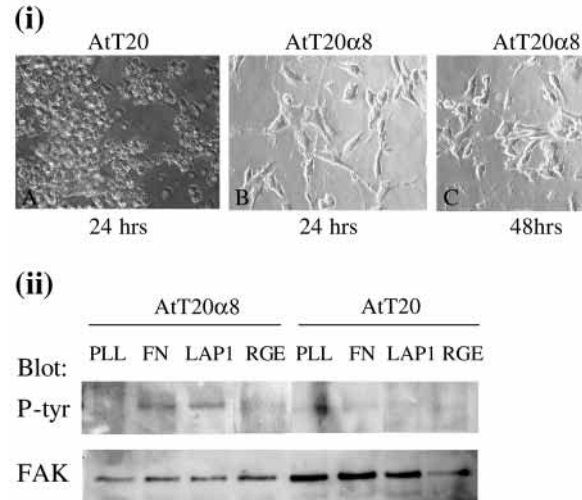

**Fig. 2.** (i)  $\alpha 8\beta 1$  mediates spreading on LAP-TGF $\beta 1$ .  $\alpha 8$ -transfected or mock-transfected AtT20 cells were plated on 5  $\mu\text{g/ml}$  of recombinant LAP-TGF $\beta 1$  in serum-free media for 24 or 48 hours. At 24 hours, mock transfected AtT20 cells remain rounded and unattached on LAP-TGF $\beta 1$  (A), whereas  $\alpha 8$ -transfected cells attach and spread on LAP-TGF $\beta 1$  (B). Further spreading is seen at 48 hours (C). (ii) Adhesion of  $\alpha 8\beta 1$  to LAP-TGF $\beta 1$  results in FAK phosphorylation.  $\alpha 8$ -transfected or mock-transfected AtT20 cells were plated on 0.01% poly-L-lysine (PLL), 5  $\mu\text{g/ml}$  fibronectin (FN), 5  $\mu\text{g/ml}$  LAP-TGF $\beta 1$  (LAP1) or 5  $\mu\text{g/ml}$  RGE-LAP-TGF $\beta 1$  (RGE) for 30 minutes in serum-free media. Cells were lysed in buffer containing phosphatase inhibitors, immunoprecipitated with anti-FAK antibody followed by western blotting with either anti-phosphotyrosine antibody PY20 (top panel) or anti-FAK antibody (bottom panel).

#### Discussion

We present evidence that LAP-TGF $\beta 1$  is a ligand for the integrin  $\alpha 8\beta 1$ , and binding results in activation of cell signaling pathways associated with cell survival and proliferation. The main biological roles of active TGF $\beta 1$  include growth inhibition of epithelial, endothelial and hematopoietic cells, increase extracellular matrix (ECM) formation and immunomodulation (Taipale et al., 1998). Interestingly, LAP-TGF $\beta 1$  may regulate cell behaviors such as cell proliferation in a manner distinct from active TGF $\beta 1$ . LAP-TGF $\beta 1$  is targeted to the ECM by LTBP, where LAP-TGF $\beta 1$  localizes to fibrillar structures of the ECM (Taipale et al., 1996). The half-life of TGF $\beta 1$  in plasma is short; however, LAP-TGF $\beta 1$  half-life is significantly longer (Wakefield et al., 1990) and may be increased by incorporation into the ECM. The extracellular matrix is a complex meshwork of proteins and proteoglycans. In addition to structural support, the ECM directly effects cell signaling through interactions with cell surface receptors such as integrins. The ECM also serves as a 'sponge' for many growth factors and cytokines (Saharinen et al., 1999). LAP-TGF $\beta 1$  incorporation into the ECM may increase its local concentration and facilitate signaling through  $\alpha 8$ -expressing cells. Normally, the ability of TGF $\beta 1$  to interact with its receptor requires cleavage of LAP or activation of TGF $\beta 1$  by other mechanisms. However, we show that the 'latent form' of TGF $\beta 1$  can signal independently from activation. Therefore, additional complexity of TGF signaling

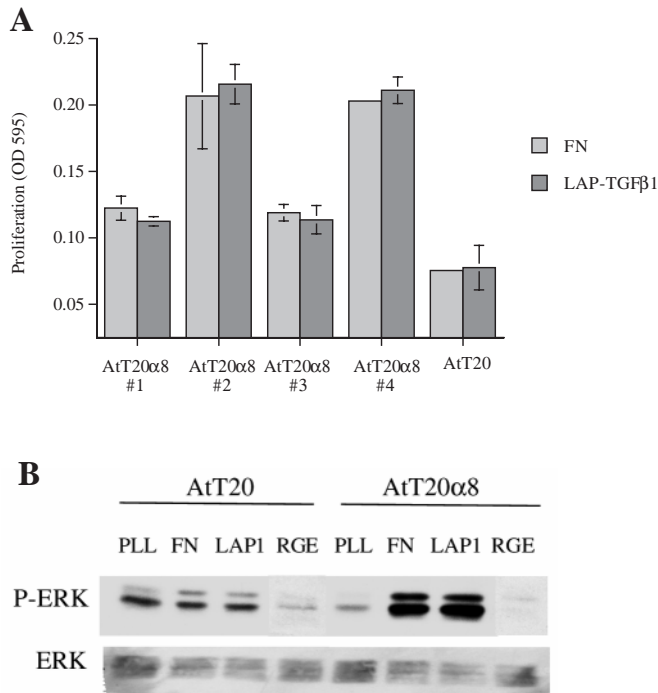

**Fig. 3.** (A) Proliferation of cells adherent to LAP-TGFβ1. Equal numbers of α8-transfected or mock-transfected AtT20 cells were plated on 5 μg/ml LAP-TGFβ1 or 5 μg/ml fibronectin (FN) in serum-free media. After 3 days, proliferation was assayed using the Roche Cell Proliferation kit (MTT). Results for four independent clones of AtT20α8 cells are shown. Data is reported as the mean absorbance of triplicate wells ± s.d. (B) ERK phosphorylation on LAP-TGFβ1. α8-transfected or mock-transfected AtT20 cells were plated on 0.01% poly-L-lysine (PLL) 5 μg/ml fibronectin (FN), 5 μg/ml LAP-TGFβ1 (LAP1), or 5 μg/ml RGE-LAP-TGFβ1 (RGE) for 30 minutes in serum-free media and then lysed in buffer containing phosphatase inhibitors. Equal amounts of protein were loaded and probed with an antibody to phospho-ERK (top) or ERK (bottom).

may be obtained by regulating the levels of LAP-TGFβ vs. active TGFβ.

Ligands for integrins include ECM proteins such as fibronectin, collagens, and laminin, and cell surface counter receptors such as immunoglobulin superfamily members. However, the ligand repertoire of integrins may be considerably greater, considering the number of proteins that contain potential integrin binding motifs. For example, several viruses contain conserved RGD sequences in their envelope, which interact with integrins and contribute to viral adhesion and entry (Chiu et al., 1999; Jackson et al., 2000; Neff et al., 1998). Disintegrins also contain RGD sites that are used to interact with integrins (Gould et al., 1990; McLane et al., 1998; Niewiarowski et al., 1994).

We show that α8β1 recognizes LAP-TGFβ1 via the RGD sequence. α8, along with α5, αv and αIIb, form a subfamily of integrin subunits that are related based on sequence homology, binding to RGD sequences and absence of I domain. Three other family members, αvβ1, αvβ6 and αvβ8, also bind LAP-TGFβ1. However, only αvβ6 or αvβ8 binding to LAP-TGFβ1 activates TGFβ1 (Mu et al., 2002; Munger et al., 1999). Thus, the adhesion of α8β1 more closely resembles

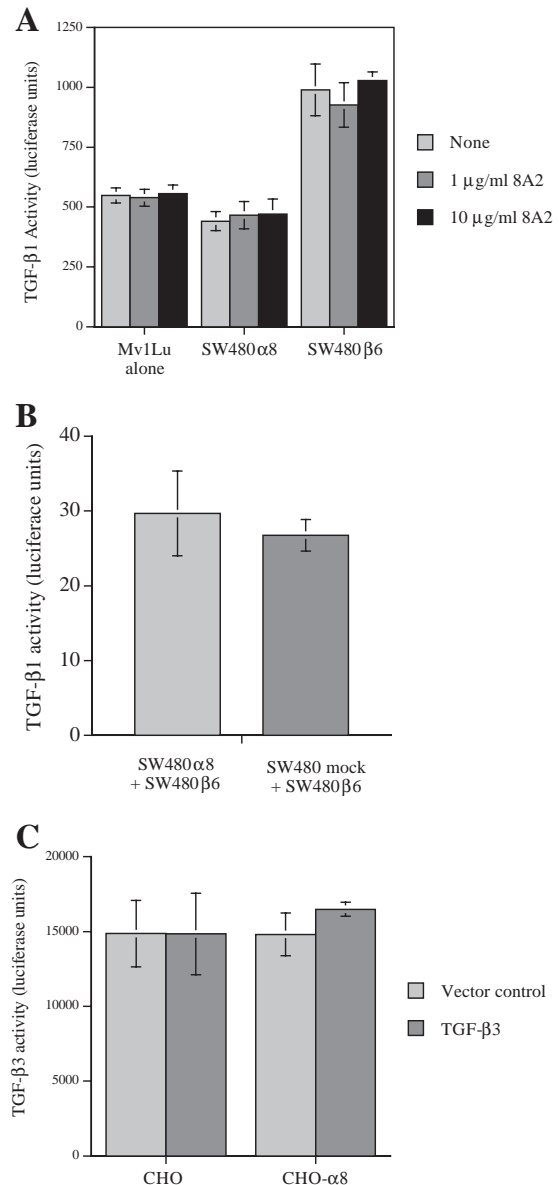

**Fig. 4.** (A) Adhesion of LAP-TGFβ1 to α8β1 does not activate TGFβ1. Equal number of Mv1Lu reporter cells and test cells (SW480α8 or SW480β6) were co-cultured for 16 hours with indicated concentrations of the integrin-activating antibody 8A2 and lysed for measurement of luciferase activity. Results are the means of at least two experiments done in duplicate. (B) α8-transfected cells do not affect TGFβ1 activation by SW480β6 cells. Mv1Lu reporter cells were cultured with SW480α8 cells and SW480β6 cells, or mock-transfected SW480 cells and SW480β6 cells, for 16 hours and lysed for measurement of luciferase activity. Results are the means of duplicate experiments ± s.d. (C) Adhesion of LAP-TGFβ3 to α8β1 does not activate TGFβ3. CHO or CHOα8 cells were transiently transfected with full-length expression construct of TGFβ3. After 16 hours, transfected cells were cultured for 24 hours with Mv1Lu reporter cells. Cells were lysed and luciferase activity was measured. Results are the mean of triplicate experiments ± s.d.

the adhesion of αvβ1 to LAP-TGFβ1. Although α8β1 did not result in activation of TGFβ1 by the assay performed, it may facilitate activation by another mechanism. Binding of LAP-

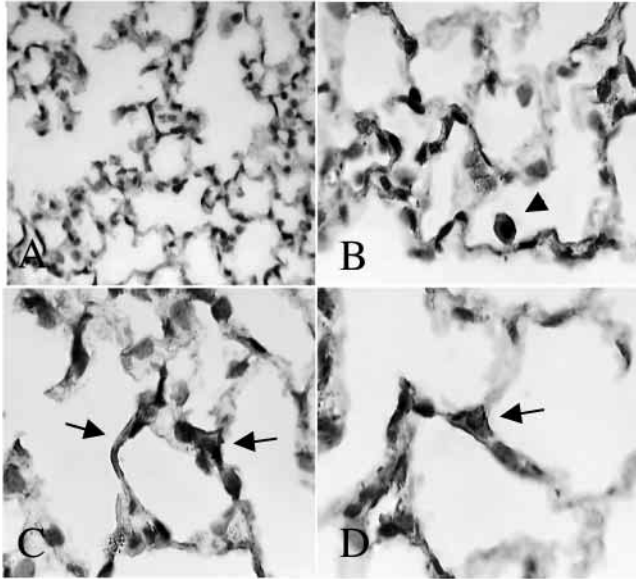

**Fig. 5.** LAP-TGF $\beta 1$  localization in adult lung tissue. Paraffin-embedded, formalin fixed tissues were stained with an antibody specific for LAP-TGF $\beta 1$  and counterstained with hematoxylin. Immunoreactivity for LAP-TGF $\beta 1$  is seen on a macrophage (arrowhead) and interstitial cells (arrows). Magnification: A, 4 $\times$ ; B,C, 20 $\times$ ; D, 40 $\times$ .

TGF $\beta 1$  to  $\alpha 8\beta 1$  may localize LAP-TGF $\beta 1$  to the cell surface and lead to activation by other pathways, such as proteolytic cleavage or by thrombospondin. The binding avidity of the integrin to LAP-TGF $\beta 1$  may determine whether TGF $\beta 1$  activation occurs. Both  $\alpha 8\beta 1$  and  $\alpha v\beta 1$  only bind to LAP-TGF $\beta 1$  at higher concentrations than  $\alpha v\beta 6$ . However, we are able to increase adhesion of  $\alpha 8\beta 1$  to LAP-TGF $\beta 1$  to levels comparable to  $\alpha v\beta 6$  by Mn $^{2+}$  or integrin  $\beta 1$ -activating antibody and despite the increased adhesion, activation of TGF $\beta 1$  did not occur. Another possibility is that a second binding determinant is required. For example, interaction of the disintegrin echistatin with  $\beta 1$  and  $\beta 3$  integrins involves a secondary binding determinant on the C-terminus in addition to the RGD site (Wierzbicka-Patynowski et al., 1999). Recently, the sequence DLXXL was reported as a ligand for  $\alpha v\beta 6$  (Kraft et al., 1999). A similar sequence is found adjacent to the RGD site in LAP-TGF $\beta 1$  (RGDLXXI), LAP-TGF- $\beta 3$  (RGDLXXL) and adjacent to the RGD site in Foot and Mouth Disease Virus, another recently described ligand for  $\alpha v\beta 6$  (Jackson et al., 2000). Therefore, activation of TGF $\beta 1$  by integrin binding may be determined by sequence adjacent to RGD sequence. Because LAP-TGF $\beta 3$  also contains an RGD sequence, we examined adhesion of  $\alpha 8\beta 1$  to LAP-TGF $\beta 3$ . We found  $\alpha 8$ -transfected cells adhered similarly to LAP-TGF $\beta 3$  as to LAP-TGF $\beta 1$ . However, similar to  $\alpha 8\beta 1$ -LAP-TGF $\beta 1$  interaction,  $\alpha 8\beta 1$ -LAP-TGF $\beta 3$  interaction was not sufficient to activate LAP-TGF $\beta 3$ .

Integrins such as  $\alpha 8\beta 1$  and  $\alpha v\beta 1$  that bind but do not activate LAP-TGF $\beta 1$  may negatively regulate TGF $\beta 1$  activity by sequestering latent TGF $\beta 1$  and preventing access to an activating integrin such as  $\alpha v\beta 6$ . Although we did not see this affect in vitro, excess TGF $\beta 1$  is present in serum and may overcome sequestration by  $\alpha 8\beta 1$ . Another explanation for the

lack of affect of  $\alpha 8\beta 1$  on  $\alpha v\beta 6$ -mediated activation was that  $\alpha 8\beta 1$  and  $\alpha v\beta 6$  were expressed on different cells. However, this mimics the in vivo situation, where  $\alpha v\beta 6$  is expressed on epithelial cells and  $\alpha 8\beta 1$  is expressed on interstitial cells (Breuss et al., 1995; Levine et al., 2000).

Is the concentration of LAP-TGF $\beta 1$  required to see an effect physiologically relevant? We have several lines of evidence to suggest it might be. Measurements of TGF $\beta 1$  concentrations in bronchoalveolar lavage fluid (BALF) from 67 patients with persistent acute respiratory distress syndrome (ARDS) showed values as high as 973 pg/ml, with an average concentration of 124 pg/ml  $\pm$  182 pg/ml (Personal communication, Richard B. Goodman, University of Washington). Significant immunoreactivity was only detected after acid activation of BALF, indicating that the measured TGF $\beta 1$  was present in the latent form. Because bronchoalveolar lavage in humans has been reported to dilute lung fluid by 100- fold (Miller et al., 1992), we estimate the lung fluid concentrations of LAP TGF $\beta 1$  in these patients to be as high as 0.1  $\mu$ g/ml, with an average concentration of 12 ng/ml. This value is likely to underestimate the LAP-TGF $\beta 1$  concentration within the microenvironment of the lung parenchyma, as the distribution of LAP-TGF $\beta 1$  is heterogeneous (Fig. 5). Next, we measured LAP-TGF $\beta 1$  in mouse lung homogenates and detected a range of LAP-TGF $\beta 1$  from 0.5 to 8  $\mu$ g/mg lung tissue, with an average of 3.38  $\mu$ g $\pm$ 4. Finally, in vitro interactions of the integrin  $\alpha v\beta 6$  with LAP-TGF $\beta 1$  occur with coating concentrations in the microgram range and this interaction has important physiological consequences in the regulation of lung inflammation (Munger et al., 1999). Thus, we conclude that coating concentrations of LAP-TGF $\beta 1$  used in this report are in the range of concentrations potentially encountered in vivo.

LAP-TGF $\beta 1$  distribution in the lung interstitium was similar to  $\alpha 8$  distribution suggesting that  $\alpha 8\beta 1$ -LAP-TGF $\beta 1$  interactions distribution can occur in vivo. The ability of  $\alpha 8\beta 1$ -LAP-TGF $\beta 1$  interaction to induce FAK and ERK phosphorylation and promote cell proliferation strongly argues that LAP may be a relevant biological ligand in vivo and that interactions of cells with ECM-bound LAP may result in alterations in cell behavior. LAP-TGF $\beta 1$  ligation to  $\alpha 8\beta 1$  resulted in cell spreading, adhesion, proliferation, and phosphorylation of FAK and ERK. LAP-TGF $\beta 3$  is likely to have similar effects. Thus, independent of its role in regulating the amount of active TGF $\beta 1$ , LAP-TGF $\beta 1$  may have a novel role in regulation of cell behavior via interaction with integrins such as  $\alpha 8\beta 1$ .

This work was supported by AHA-Heritage Affiliate Grant-in-Aid, AHA Northwest Affiliate Grant-in-Aid and RO1 HL 57890 (to L.M.S.)

## References

- Abe, M., Harpel, J. G., Metz, C. N., Nunes, I., Loskutoff, D. J. and Rifkin, D. B. (1994). An assay for transforming growth factor-beta using cells transfected with a plasminogen activator inhibitor-1 promoter-luciferase construct. *Anal. Biochem.* **216**, 276-284.
- Annes, J. P., Rifkin, D. B. and Munger, J. S. (2002). The integrin  $\alpha v\beta 6$  binds and activates latent TGF $\beta 3$ . *FEBS Lett.* **511**, 65-68.
- Brandenberger, R., Schmidt, A., Linton, J., Wang, D., Backus, C., Denda, S., Muller, U. and Reichardt, L. F. (2001). Identification and characterization of a novel extracellular matrix protein nephronectin that is associated with integrin  $\alpha 8\beta 1$  in the embryonic kidney. *J. Cell Biol.* **154**, 447-458.

- Breuss, J. M., Gallo, J., DeLisser, H. M., Klimanskaya, I. V., Folkesson, H. G., Pittet, J. F., Nishimura, S. L., Aldape, K., Landers, D. V., Carpenter, W. et al.** (1995). Expression of the beta 6 integrin subunit in development, neoplasia and tissue repair suggests a role in epithelial remodeling. *J. Cell Sci.* **108**, 2241-2251.
- Chiu, C. Y., Mathias, P., Nemerow, G. R. and Stewart, P. L.** (1999). Structure of adenovirus complexed with its internalization receptor, alphavbeta5 integrin. *J. Virol.* **73**, 6759-6768.
- Denda, S., Reichardt, L. F. and Muller, U.** (1998). Identification of osteopontin as a novel ligand for the integrin alpha8 beta1 and potential roles for this integrin-ligand interaction in kidney morphogenesis. *Mol. Biol. Cell* **9**, 1425-1435.
- Gould, R. J., Polokoff, M. A., Friedman, P. A., Huang, T. F., Holt, J. C., Cook, J. J. and Niewiarowski, S.** (1990). Disintegrins: a family of integrin inhibitory proteins from viper venoms. *Proc Soc Exp. Biol. Med.* **195**, 168-171.
- Jackson, T., Sheppard, D., Denyer, M., Blakemore, W. and King, A. M.** (2000). The epithelial integrin alphavbeta6 is a receptor for foot-and-mouth disease virus. *J. Virol.* **74**, 4949-4956.
- Kraft, S., Diefenbach, B., Mehta, R., Jonczyk, A., Luckenbach, G. A. and Goodman, S. L.** (1999). Definition of an unexpected ligand recognition motif for alphav beta6 integrin. *J. Biol. Chem.* **274**, 1979-1985.
- Levine, D., Rockey, D. C., Milner, T. A., Breuss, J. M., Fallon, J. T. and Schnapp, L. M.** (2000). Expression of the integrin alpha8beta1 during pulmonary and hepatic fibrosis. *Am. J. Pathol.* **156**, 1927-1935.
- Madtes, D. K., Elston, A. L., Kaback, L. A. and Clark, J. G.** (2001). Selective induction of tissue inhibitor of metalloproteinase-1 in bleomycin-induced pulmonary fibrosis. *Am. J. Respir. Cell Mol. Biol.* **24**, 599-607.
- McLane, M. A., Marcinkiewicz, C., Vijay-Kumar, S., Wierzbicka-Patynowski, I. and Niewiarowski, S.** (1998). Viper venom disintegrins and related molecules. *Proc. Soc. Exp. Biol. Med.* **219**, 109-119.
- Miller, E. J., Cohen, A. B., Nagao, S., Griffith, D., Maunder, R. J., Martin, T. R., Weiner-Kronish, J. P., Sticherling, M., Christophers, E. and Matthay, M. A.** (1992). Elevated levels of NAP-1/interleukin-8 are present in the airspaces of patients with the adult respiratory distress syndrome and are associated with increased mortality. *Am. Rev. Respir. Dis.* **146**, 427-432.
- Mu, D., Cambier, S., Fjellbirkeland, L., Baron, J. L., Munger, J. S., Kawakatsu, H., Sheppard, D., Broaddus, V. C. and Nishimura, S. L.** (2002). The integrin alpha(v)beta8 mediates epithelial homeostasis through MT1-MMP-dependent activation of TGF-beta1. *J. Cell Biol.* **157**, 493-507.
- Muller, U., Bossy, B., Venstrom, K. and Reichardt, L. F.** (1995). Integrin alpha 8 beta 1 promotes attachment, cell spreading, and neurite outgrowth on fibronectin. *Mol. Biol. Cell* **6**, 433-448.
- Munger, J. S., Harpel, J. G., Giancotti, F. G. and Rifkin, D. B.** (1998). Interactions between growth factors and integrins: latent forms of transforming growth factor-beta are ligands for the integrin alphavbeta1. *Mol. Biol. Cell* **9**, 2627-2638.
- Munger, J. S., Huang, X., Kawakatsu, H., Griffiths, M. J., Dalton, S. L., Wu, J., Pittet, J. F., Kaminski, N., Garat, C., Matthay, M. A. et al.** (1999). The integrin alpha v beta 6 binds and activates latent TGF beta 1: a mechanism for regulating pulmonary inflammation and fibrosis. *Cell* **96**, 319-328.
- Neff, S., Sa, C. D., Rieder, E., Mason, P. W., Blystone, S. D., Brown, E. J. and Baxt, B.** (1998). Foot-and-mouth disease virus virulent for cattle utilizes the integrin alpha(v)beta3 as its receptor. *J. Virol.* **72**, 3587-3594.
- Niewiarowski, S., McLane, M. A., Kloczewiak, M. and Stewart, G. J.** (1994). Disintegrins and other naturally occurring antagonists of platelet fibrinogen receptors. *Semin. Hematol.* **31**, 289-300.
- Saharinen, J., Hyytiainen, M., Taipale, J. and Keski-Oja, J.** (1999). Latent transforming growth factor-beta binding proteins (LTBPs)—structural extracellular matrix proteins for targeting TGF-beta action. *Cytokine Growth Factor Rev.* **10**, 99-117.
- Schnapp, L. M., Breuss, J. M., Ramos, D. M., Sheppard, D. and Pytela, R.** (1995a). Sequence and tissue distribution of the human integrin alpha 8 subunit: a beta 1-associated alpha subunit expressed in smooth muscle cells. *J. Cell Sci.* **537-544**.
- Schnapp, L. M., Hatch, N., Ramos, D. M., Klimanskaya, I. V., Sheppard, D. and Pytela, R.** (1995b). The human integrin alpha 8 beta 1 functions as a receptor for tenascin, fibronectin, and vitronectin. *J. Biol. Chem.* **270**, 23196-23202.
- Taipale, J., Saharinen, J., Hedman, K. and Keski-Oja, J.** (1996). Latent transforming growth factor-beta 1 and its binding protein are components of extracellular matrix microfibrils. *J. Histochem. Cytochem.* **44**, 875-889.
- Taipale, J., Saharinen, J. and Keski-Oja, J.** (1998). Extracellular matrix-associated transforming growth factor-beta: role in cancer cell growth and invasion. *Adv. Cancer Res.* **75**, 87-134.
- Wakefield, L. M., Winokur, T. S., Hollands, R. S., Christopherson, K., Levinson, A. D. and Sporn, M. B.** (1990). Recombinant latent transforming growth factor beta 1 has a longer plasma half-life in rats than active transforming growth factor beta 1, and a different tissue distribution. *J. Clin. Invest.* **86**, 1976-1984.
- Wierzbicka-Patynowski, I., Niewiarowski, S., Marcinkiewicz, C., Calvete, J. J., Marcinkiewicz, M. M. and McLane, M. A.** (1999). Structural requirements of echistatin for the recognition of alpha(v)beta(3) and alpha(5)beta(1) integrins. *J. Biol. Chem.* **274**, 37809-37814.
